# Supplementary material
Source: HighWire-hosted journal article supplement (https://genome.cshlp.org/content/suppl/2005/10/04/15.10.1379)

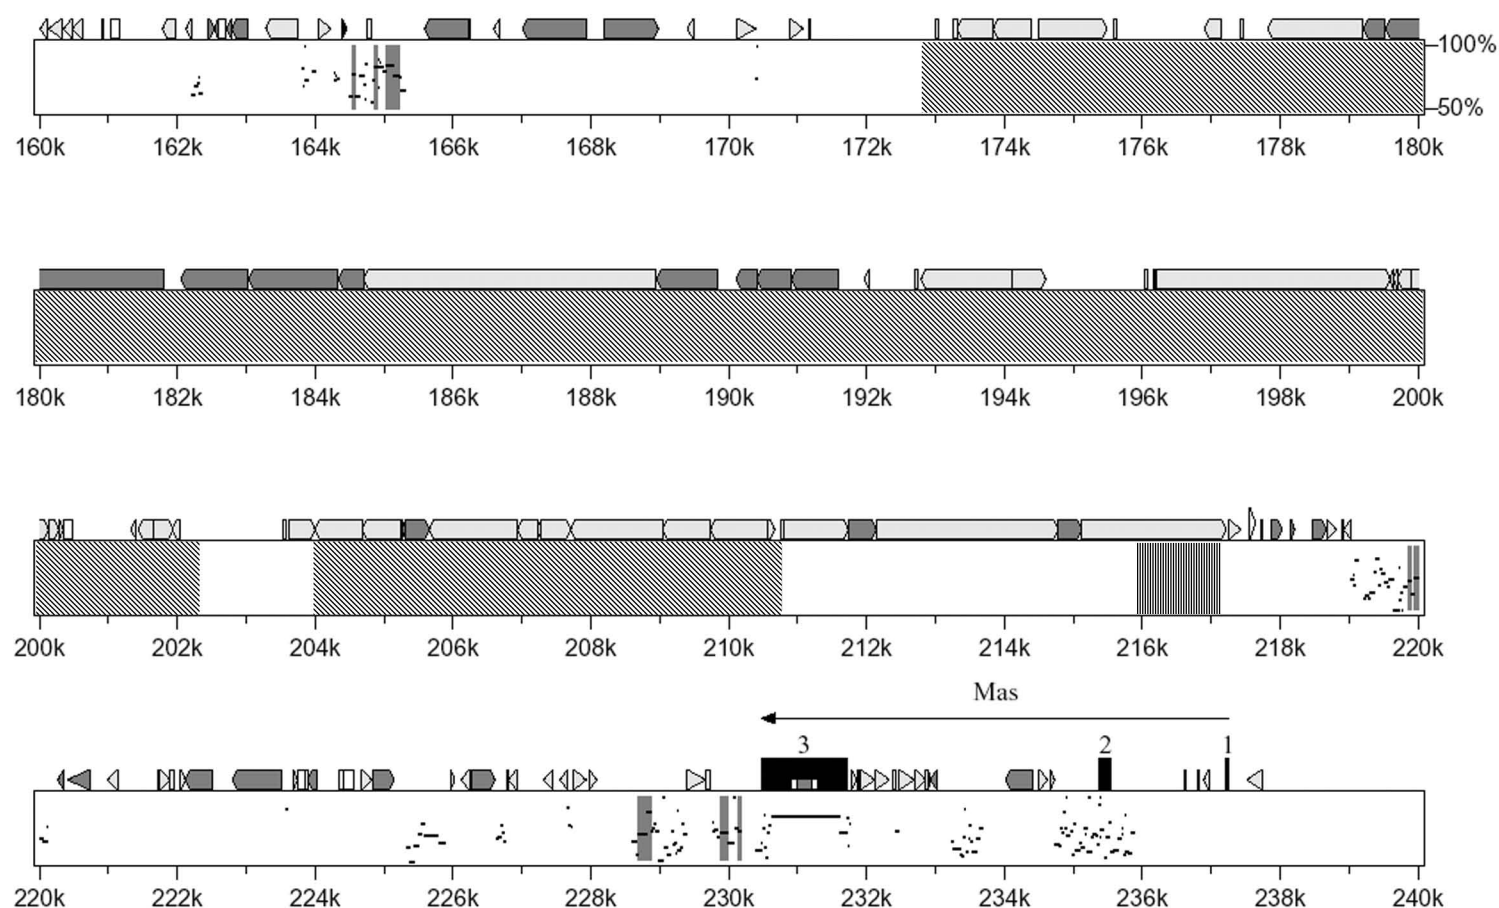

Supplement: Supp_Fig_2B.pdf [file Supp_Fig_2B.pdf]
